# Supplementary material
Source: PubMed Central journal article supplement (PMC6635733)

## The NHLBI LAM Registry

### Prognostic Physiologic and Radiologic Biomarkers Emerge From a 15-Year Prospective Longitudinal Analysis

*Nishant Gupta, MD; Hye-Seung Lee, PhD; Jay H. Ryu, MD;  
Angelo M. Taveira-DaSilva, MD, PhD; Gerald J. Beck, PhD; Jar-Chi Lee, MS;  
Kevin McCarthy, RCPT; Geraldine A. Finlay, MD; Kevin K. Brown, MD;  
Stephen J. Ruoss, MD; Nilo A. Avila, MD; Joel Moss, MD, PhD; Francis X. McCormack, MD;  
for the NHLBI LAM Registry Group*

CHEST 2019; 155(2):288-296

**e-Table 1: Scoring sheet to calculate radiologic disease severity**

| Lung Zone | Extent of LAM burden on right lung (0 – 3) | Extent of LAM burden on left lung (0 – 3) | Total Score Right | Total Score Left | Total CT score |
|-----------|--------------------------------------------|-------------------------------------------|-------------------|------------------|----------------|
| Upper     |                                            |                                           |                   |                  |                |
| Middle    |                                            |                                           |                   |                  |                |
| Lower     |                                            |                                           |                   |                  |                |

**Definitions:**

Upper lung zone = Apex to carina

Middle lung zone = Carina to inferior pulmonary vein

Lower lung zone: Inferior pulmonary vein to diaphragm

Disease extent scoring criteria:

0 = No abnormality

1 = <30% abnormality

2 = 31-60% abnormality

3 = >61% abnormality

Total disease severity score was calculated by adding up the scores for each lung zone. The total score could range from 0 – 18. For each patient, the CT score was calculated independently by two different thoracic radiologists. The final score was computed as an average of the two independent CT scores.

**e-Table 2: Association between various disease-related parameters and the risk of death or lung transplantation.** All disease-related parameters in this analysis were adjusted for age at diagnosis, except the one marked with asterisk.

| Characteristics                          | N, Mean (standard deviation) or N (%) |                               | Hazard ratio (95% confidence interval) | p-value           |         |
|------------------------------------------|---------------------------------------|-------------------------------|----------------------------------------|-------------------|---------|
|                                          | Lung transplantation or death         | Censored on December 31, 2014 |                                        |                   |         |
| Age at diagnosis*                        | 68, 40.0 (9.3)                        | 148, 41.5 (10.2)              | 0.99 (0.96, 1.01)                      | 0.26              |         |
| FEV1 % predicted                         | 69, 51.3 (20.1)                       | 146, 78.0 (21.0)              | 0.96 (0.95, 0.97)                      | <0.0001           |         |
| FEV1 slope (ml/year)                     | 69, -108 (53.5)                       | 146, -80 (51.1)               | 0.992 (0.988, 0.995)                   | <0.0001           |         |
| FVC % predicted                          | 69, 80.0 (15.1)                       | 146, 89.0 (17.0)              | 0.98 (0.97, 0.99)                      | 0.005             |         |
| FVC slope in the follow-up (ml per year) | 69, -84 (61.3)                        | 146, -65.3 (55)               | 0.994 (0.990, 0.998)                   | 0.006             |         |
| DLCO % predicted                         | 68, 44.2 (15.8)                       | 146, 71.8 (22.1)              | 0.95 (0.94, 0.96)                      | <0.0001           |         |
| DLCO Slope (ml/mmHg/min/year)            | 68, -0.73 (0.14)                      | 146, -0.85 (0.22)             | 8.28 (2.3, 29.67)                      | 0.001             |         |
| CT score                                 | 54, 14.0 (4.4)                        | 111, 9.6 (4.1)                | 1.18 (1.11, 1.26)                      | <0.0001           |         |
| Log <sub>2</sub> (VEGF-D)                | 47, 10.3 (1.3)                        | 112, 9.8 (1.4)                | 1.22 (0.99, 1.50)                      | 0.06              |         |
| Log <sub>2</sub> (VEGF-D) Slope          | 47, 0.18 (0.28)                       | 112, 0.07 (0.3)               | 2.53 (0.99, 6.49)                      | 0.05              |         |
| Serum VEGF-D >600pg/ml                   | No                                    | 11 (21)                       | 42 (79)                                | Ref               | 0.10    |
|                                          | Yes                                   | 36 (34)                       | 70 (66)                                | 1.76 (0.89, 3.48) |         |
| Bronchodilator response                  | No                                    | 46 (28)                       | 120 (72)                               | Ref               | 0.004   |
|                                          | Yes                                   | 23 (48)                       | 25 (52)                                | 2.15 (1.28, 3.59) |         |
| Angiomyolipomas                          | No                                    | 43 (33)                       | 86 (67)                                | Ref               | 0.43    |
|                                          | Yes                                   | 26 (30)                       | 62 (70)                                | 0.82 (0.50, 1.35) |         |
| Menopausal status                        | No                                    | 26 (37)                       | 44 (63)                                | Ref               | 0.06    |
|                                          | Yes                                   | 38 (28)                       | 97 (72)                                | 0.56 (0.30, 1.03) |         |
| H/o pneumothorax                         | No                                    | 27 (28)                       | 69 (72)                                | Ref               | 0.72    |
|                                          | Yes                                   | 41 (34)                       | 79 (66)                                | 1.10 (0.64, 1.90) |         |
| Supplemental oxygen use                  | No                                    | 27 (18)                       | 120 (82)                               | Ref               | <0.0001 |
|                                          | Yes                                   | 42 (60)                       | 28 (40)                                | 4.09 (2.48, 6.72) |         |
| Number of pneumothoraces per patient     |                                       | 2.8 (4.5)                     | 2.2 (5.3)                              | 1.00 (0.96, 1.04) | 0.96    |
| Sporadic LAM                             |                                       | 59 (33)                       | 121 (67)                               | Ref               | 0.59    |
| TSC LAM                                  |                                       | 9 (25)                        | 27 (75)                                | 0.83 (0.41, 1.67) |         |

**Abbreviations:** DLCO = Diffusion capacity of the lung for carbon monoxide, FEV1 = Forced expiratory volume in one-second, FVC = Forced vital capacity, LAM = Lymphangiomyomatosis, TSC = Tuberosus sclerosis complex, VEGF-D = Vascular endothelial growth factor-D.

**e-Table 3: Difference in baseline FEV1 and rate of decline of FEV1 in our cohort when divided into patients with and without bronchodilator responsiveness on spirometry.** Patients with a positive bronchodilator response on spirometry had worse FEV1 at the time of registry enrollment as compared to the patients without bronchodilator responsiveness ( $p=0.0007$ ), and had a trend towards a faster rate of decline of FEV1 ( $p=0.09$ ).

| <b>Bronchodilator responsiveness</b> | <b>Number of patients</b> | <b>Mean baseline FEV1 (Liters)</b> | <b>Standard deviation (liters)</b> | <b>Mean baseline FEV1 (%predicted)</b> | <b>Rate of decline of FEV1 (ml/year)</b> |
|--------------------------------------|---------------------------|------------------------------------|------------------------------------|----------------------------------------|------------------------------------------|
| No                                   | 166                       | 2.17                               | 0.76                               | 73%                                    | 82.8                                     |
| Yes                                  | 48                        | 1.72                               | 0.81                               | 57%                                    | 113.2                                    |

**Abbreviations:** Same as e-Table 2.

**e-Figure 1:** Kaplan-Meier curve demonstrating the difference in survival (based on the composite end point of death or lung transplant) in patients with or without bronchodilator responsiveness.

BR=bronchodilator responsiveness

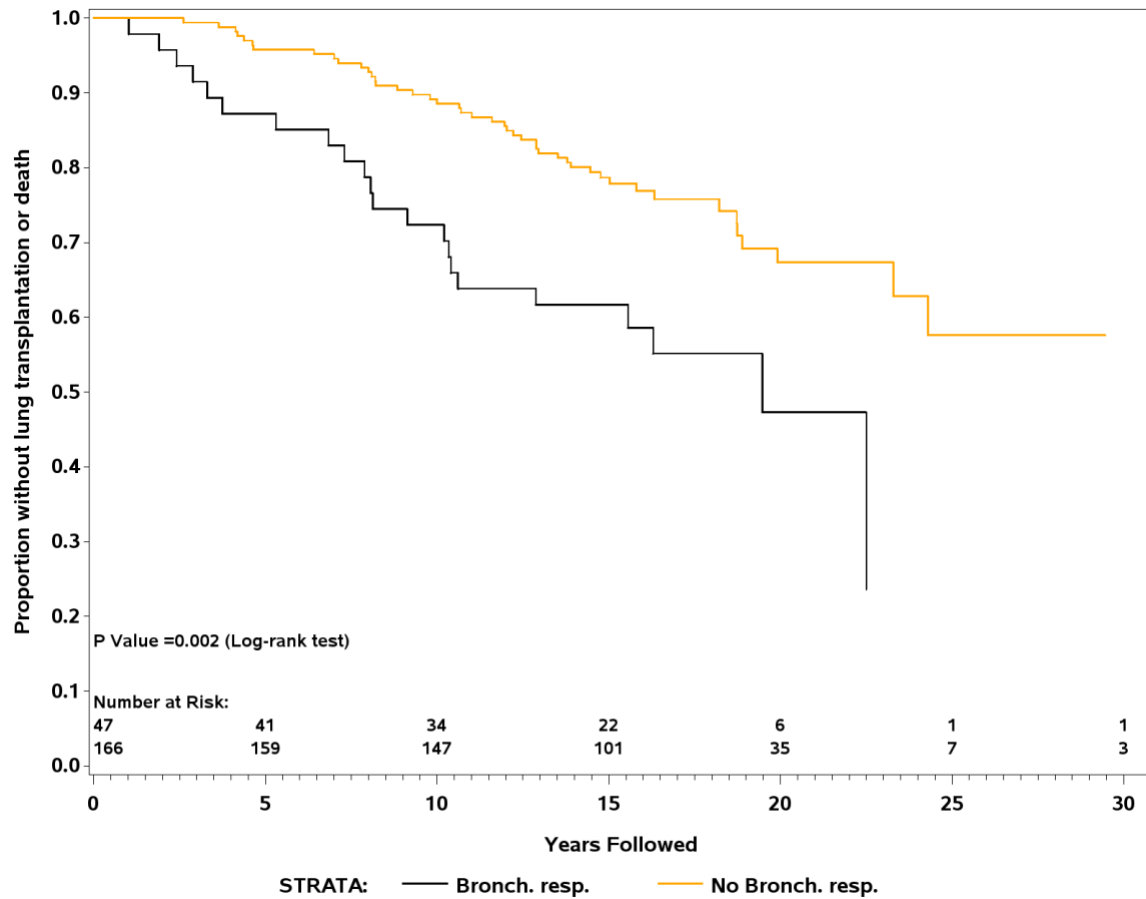

**e-Figure 2:** Kaplan-Meier curve demonstrating the difference in survival (based on the composite end point of death or lung transplant) in patients segregated based on the initial radiologic disease severity as measured by the CT score.

CT = Computed tomography

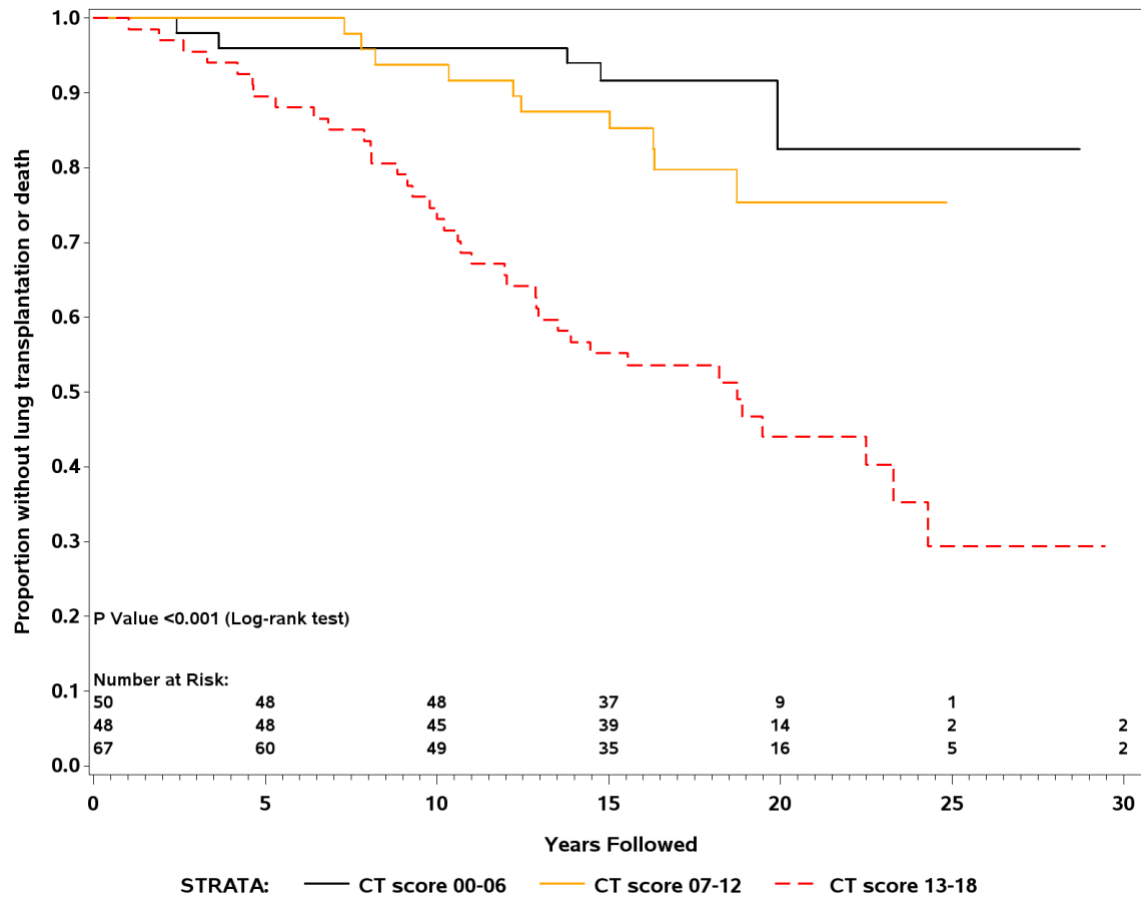

**e-Figure 3:** Kaplan-Meier curve demonstrating the difference in survival (based on the composite end point of death or lung transplant) in patients segregated based on the initial serum VEGF-D (elevated to a value greater than 800pg/ml, or serum VEGF-D less than 800 pg/ml).  
 VEGF-D = Vascular Endothelial Growth Factor-D

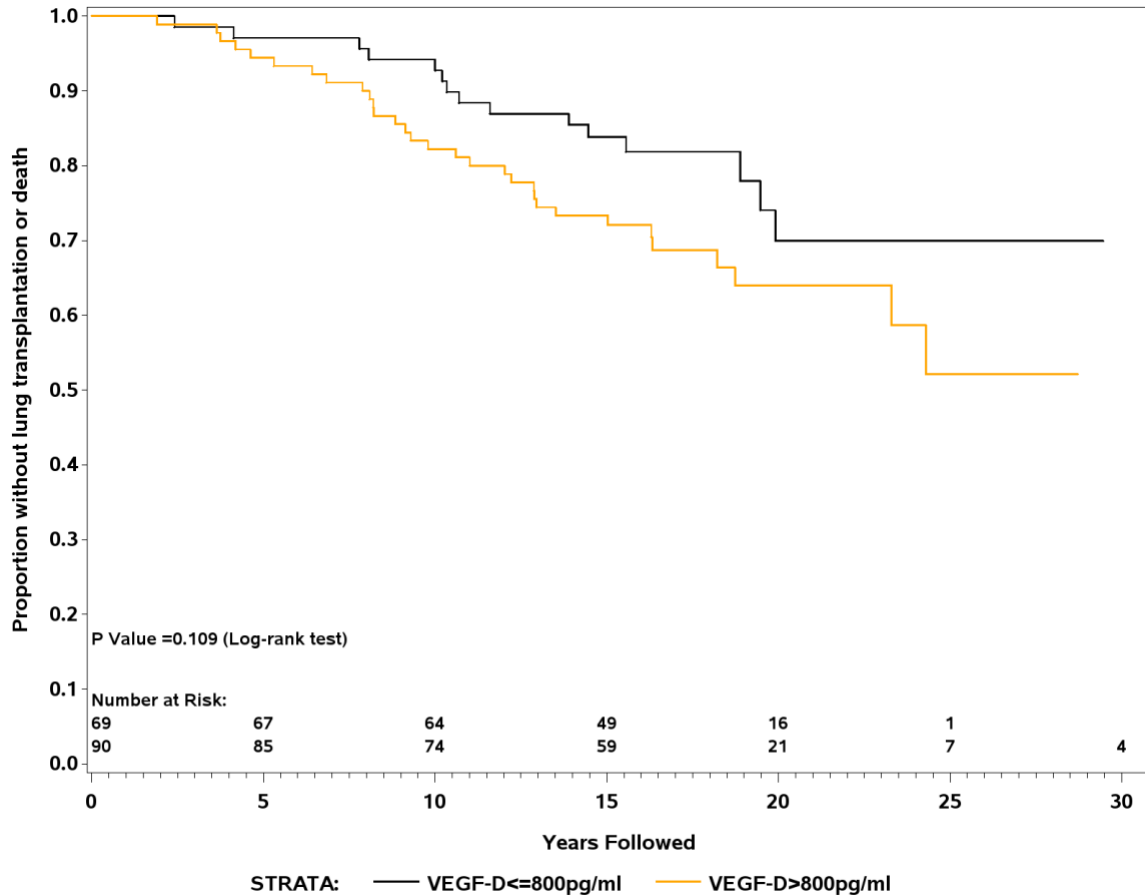

Supplement: mmc1.pdf [file mmc1.pdf]
